# Supplementary figures and images for: [89Zr]Zr-DFO-girentuximab and [18F]FDG PET/CT to Predict Watchful Waiting Duration in Patients with Metastatic Clear-cell Renal Cell Carcinoma
Source: PubMed Central journal article supplement — Clin Cancer Res. 2022 Nov 17;29(3):592–601. doi: 10.1158/1078-0432.CCR-22-0921 (PMC9890134; doi:10.1158/1078-0432.ccr-22-0921), 2022-11-17

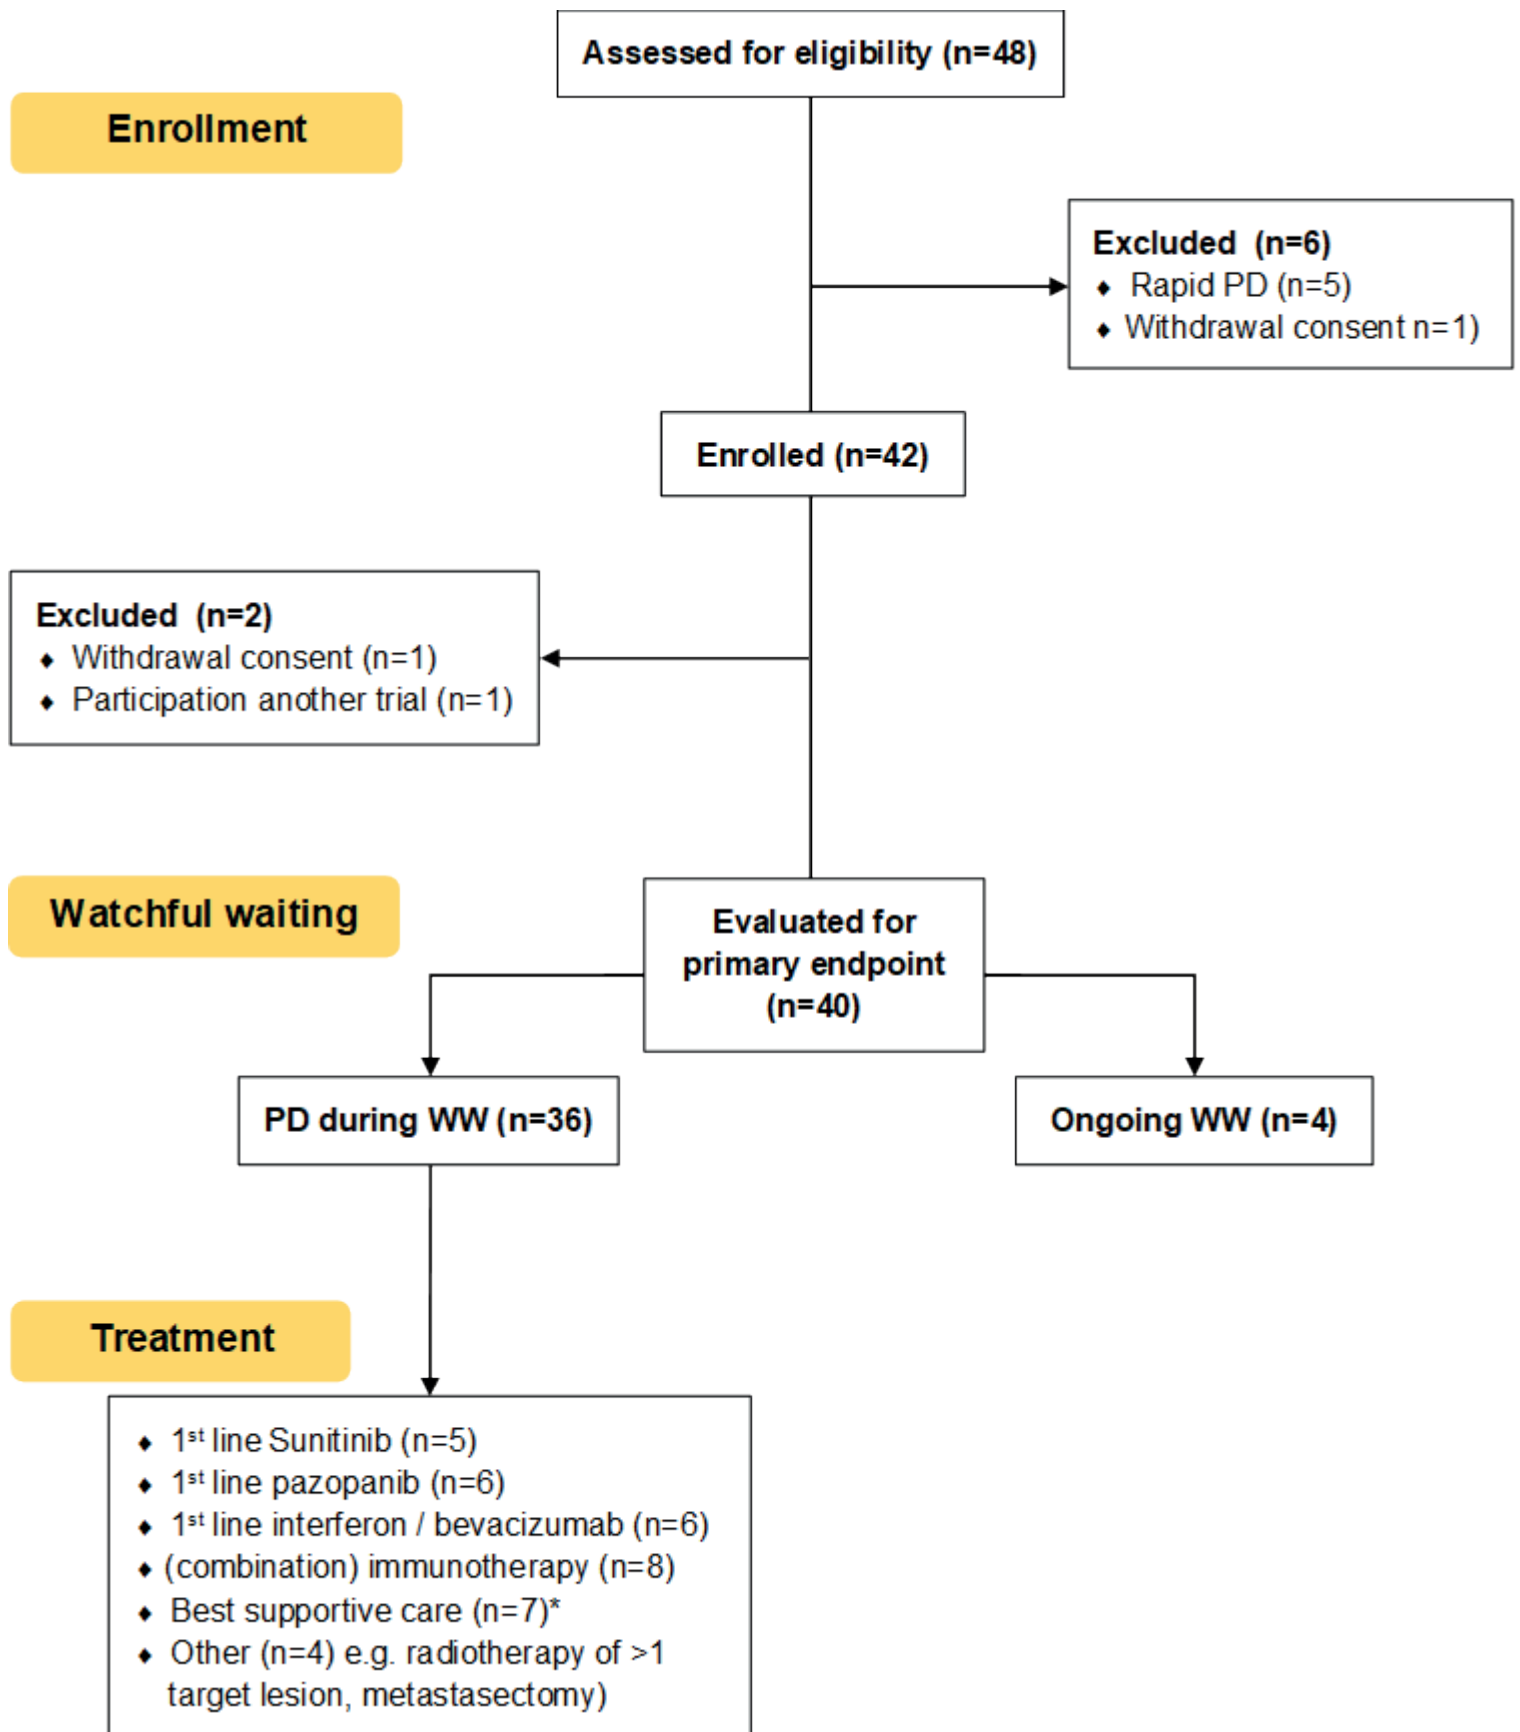

Supplemental figure 1

Supplement: ccr-22-0921_supplementary_figure_s1_supps1.pdf [file ccr-22-0921_supplementary_figure_s1_supps1.pdf]

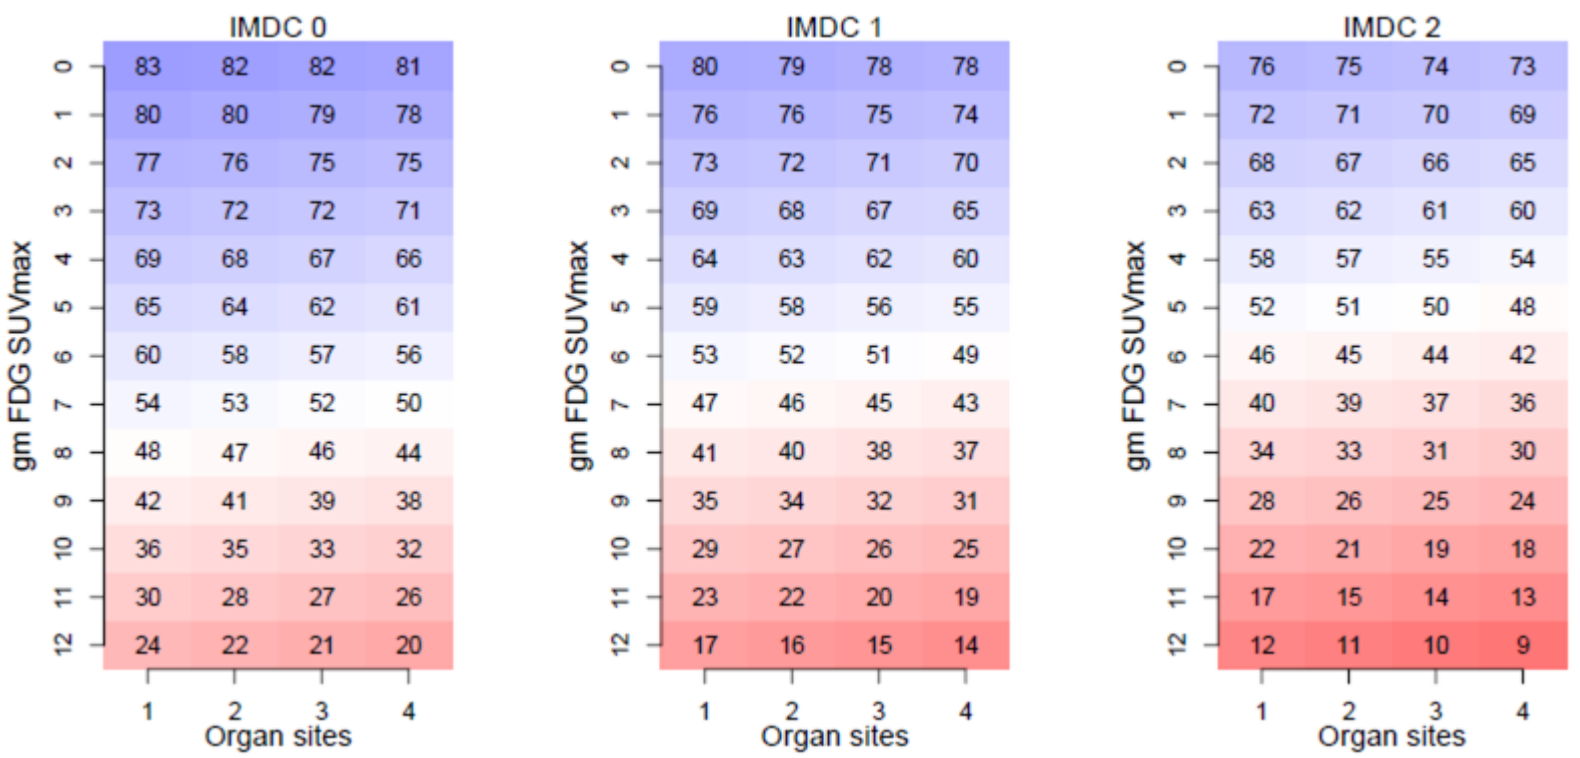

Supplemental figure 2

Supplement: ccr-22-0921_supplementary_figure_s2_supps2.pdf [file ccr-22-0921_supplementary_figure_s2_supps2.pdf]

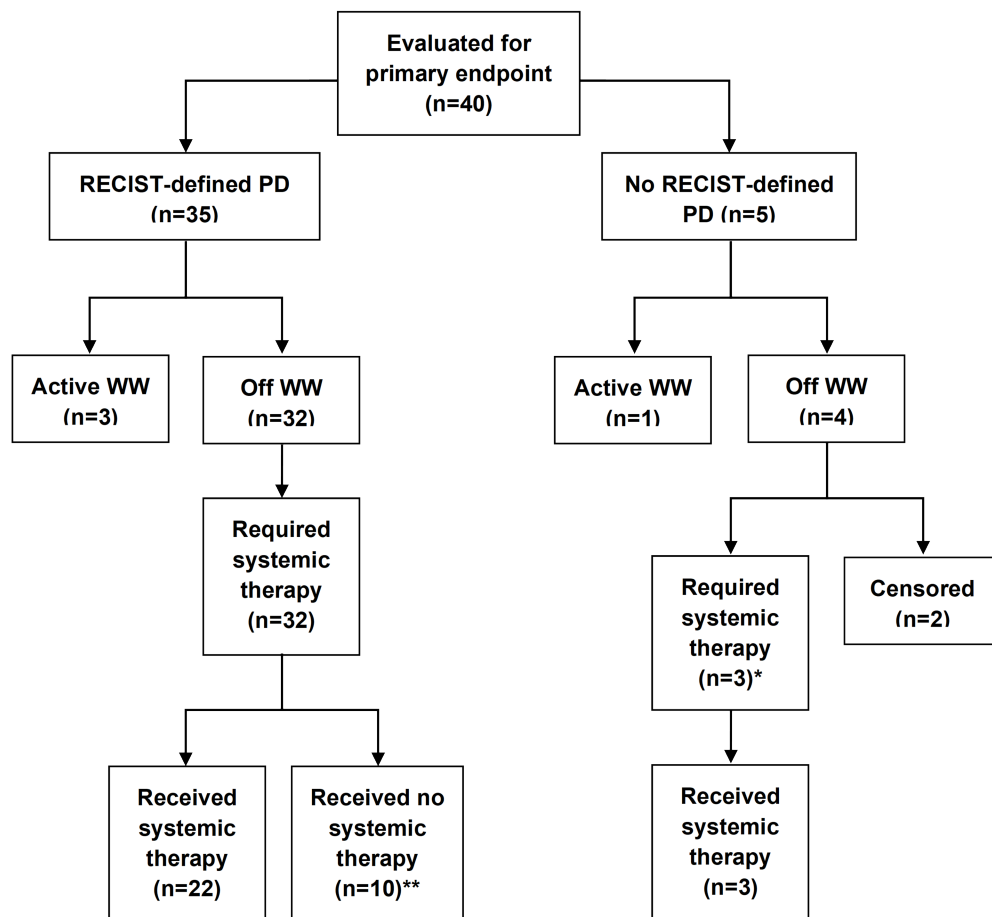

Supplemental figure 3

Supplement: ccr-22-0921_supplementary_figure_s3_supps3.pdf [file ccr-22-0921_supplementary_figure_s3_supps3.pdf]
